# Supplementary material for: Optimization of Sonication Parameters to Produce a Cashew Apple Bagasse Puree Rich in Superoxide Dismutase
Source: MDPI journal article supplement (doi:10.3390/foods11172694), 2022-09-03
Supplement: s1 [file s1]

# Supplementary materials

**Table S1.** Surface response fitted models.

| Enzyme                        | Model                                                                                                                     | R <sup>2</sup> | F <sub>9,7</sub> |
|-------------------------------|---------------------------------------------------------------------------------------------------------------------------|----------------|------------------|
| SOD                           | Y=1906.20-9882.23x+12638x <sup>2</sup> -0.01y-0.001y <sup>2</sup> +44.09z<br>-1.72z <sup>2</sup> +0.74xy-68.21xz+0.03yz   | 0.97           | 19.89            |
| CAT                           | Y=73.52+253.80x-364.81x <sup>2</sup> +0.070y-0.0002y <sup>2</sup> +1.04z-0<br>.092z <sup>2</sup> +0.02xy+0.68xz-0.001yz   | 0.97           | 33.92            |
| APX                           | Y=312.57-1175.60x+1634.48x <sup>2</sup> -0.50y+0.001y <sup>2</sup> +3.73z-<br>0.26z <sup>2</sup> +0.27xy-14.89xz+0.02yz   | 0.83           | 3.94             |
| H <sub>2</sub> O <sub>2</sub> | Y=-109.16+1147.17x-385.51x <sup>2</sup> -<br>1.08y+0.004y <sup>2</sup> +14.41z+0.79z <sup>2</sup> -2.14xy-69.71xz+0.082yz | 0.93           | 11.06            |
| POD                           | Y=144.43-582.98x+960.86x <sup>2</sup> -0.07y+0.0001y <sup>2</sup> -2.49z+0<br>.92z <sup>2</sup> +0.26xy-25.26xz-0.008yz   | 0.89           | 6.41             |
| PPO                           | Y=347.18-628.51x+756.13x <sup>2</sup> -0.12y+0.001y <sup>2</sup> -43.60z+3<br>.66z <sup>2</sup> -0.18xy+3.08xz-0.009yz    | 0.95           | 15.45            |

F – Fisher test t 95% of confidence interval

**Table S2.** Sonication effect on CAB puree color

| Assay          | L            | h°           | ΔC           | ΔE          |
|----------------|--------------|--------------|--------------|-------------|
| 1              | 66.41 ± 0.05 | 87.77 ± 0.07 | 2.24 ± 0.00  | 6.31 ± 0.04 |
| 2              | 67.13 ± 0.00 | 88.72 ± 0.01 | 2.26 ± 0.00  | 7.20 ± 0.03 |
| 3              | 64.40 ± 0.01 | 87.59 ± 0.02 | 5.22 ± 0.02  | 7.08 ± 0.01 |
| 4              | 65.01 ± 0.03 | 89.09 ± 0.01 | 5.17 ± 0.09  | 7.63 ± 0.01 |
| 5              | 63.27 ± 0.00 | 87.36 ± 0.04 | 6.21 ± 0.06  | 7.17 ± 0.00 |
| 6              | 64.64 ± 0.00 | 88.53 ± 0.11 | 5.66 ± 0.02  | 7.56 ± 0.10 |
| 7              | 65.81 ± 0.10 | 88.79 ± 0.19 | 6.03 ± 0.00  | 8.39 ± 0.04 |
| 8              | 71.03 ± 0.03 | 91.87 ± 0.03 | 5.15 ± 0.01  | 12.3 ± 0.12 |
| 9              | 65.27 ± 0.09 | 89.51 ± 0.00 | 3.22 ± 0.04  | 6.70 ± 0.00 |
| 10             | 65.68 ± 0.05 | 89.67 ± 0.00 | 3.57 ± 0.00  | 7.26 ± 0.13 |
| 11             | 64.68 ± 0.01 | 89.44 ± 0.34 | 4.28 ± 0.00  | 7.01 ± 0.05 |
| 12             | 68.60 ± 0.00 | 91.70 ± 0.01 | 3.26 ± 0.10  | 9.89 ± 0.00 |
| 13             | 65.56 ± 0.01 | 88.07 ± 0.02 | 0.84 ± 0.03  | 5.43 ± 0.04 |
| 14             | 66.28 ± 0.02 | 89.14 ± 0.01 | -0.41 ± 0.00 | 6.68 ± 0.03 |
| 15             | 67.06 ± 0.03 | 89.28 ± 0.02 | 0.61 ± 0.00  | 7.13 ± 0.01 |
| 16             | 67.67 ± 0.01 | 89.70 ± 0.00 | 0.62 ± 0.00  | 8.25 ± 0.01 |
| 17             | 66.59 ± 0.01 | 89.22 ± 0.00 | 0.61 ± 0.07  | 6.72 ± 0.02 |
| <b>Control</b> |              |              |              |             |
|                | L            | h°           | Chroma       |             |
| 1:2            | 63.10 ± 0.01 | 84.99 ± 0.09 | 43.28 ± 0.07 | --          |
| 1:3            | 61.90 ± 0.00 | 84.65 ± 0.05 | 42.09 ± 0.03 | --          |
| 1:4            | 60.79 ± 0.00 | 83.32 ± 0.00 | 40.27 ± 0.02 | --          |
